# Supplementary material
Source: PubMed Central journal article supplement (PMC2408823)
Supplement: NIHMS46290-supplement-01.pdf [file NIHMS46290-supplement-01.pdf]

# RNA Interference Guides Histone Modification during the S Phase of Chromosomal Replication

Anna Kloc, Mikel Zaratiegui, Elphege Nora,  
and Rob Martienssen

## Supplemental References

- S1. Petersen, J., and Hagan, I.M. (2003). *S. pombe* aurora kinase/survivin is required for chromosome condensation and the spindle checkpoint attachment response. *Curr. Biol.* *13*, 590–597.
- S2. Li, F., Goto, D.B., Zaratiegui, M., Tang, X., Martienssen, R., and Cande, W.Z. (2005). Two novel proteins, *dos1* and *dos2*, interact with *rik1* to regulate heterochromatic RNA interference and histone modification. *Curr. Biol.* *15*, 1448–1457.
- S3. Hiraoka, Y., Toda, T., and Yanagida, M. (1984). The *NDA3* gene of fission yeast encodes beta-tubulin: a cold-sensitive *nda3* mutation reversibly blocks spindle formation and chromosome movement in mitosis. *Cell* *39*, 349–358.
- S4. Mellone, B.G., Ball, L., Suka, N., Grunstein, M.R., Partridge, J.F., and Allshire, R.C. (2003). Centromere silencing and function in fission yeast is governed by the amino terminus of histone H3. *Curr. Biol.* *13*, 1748–1757.

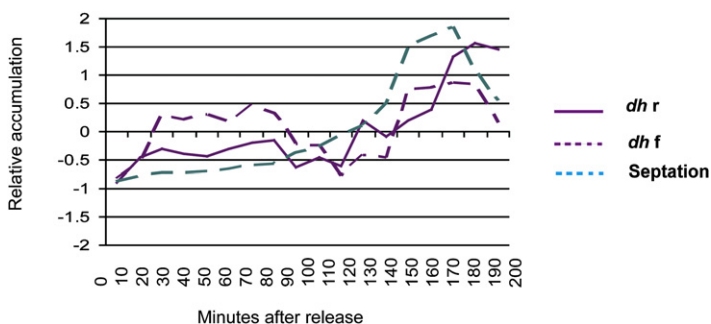

Figure S1. Cell-Cycle Analysis of Centromeric Transcripts in RNAi-Deficient Cells

Quantitative RT-PCR of *dh* centromeric transcripts (violet) during the cell cycle in *dcr1*<sup>-</sup> mutant cells. The reverse strand transcript (solid) still only increases in S phase and remains high. The forward strand transcript (dashed) is ectopically expressed throughout cell cycle. Septation index (dashed teal line) indicates S phase in *dcr1*<sup>-</sup> is delayed relative to WT (Figure 3).

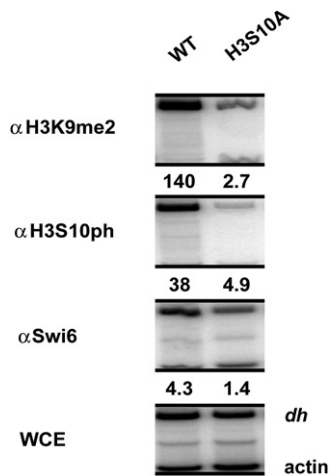

Figure S2. Chromatin Immunoprecipitation of the *dh* Pericentromeric Repeat in H3S10A Strain

In a substitution strain in which H3S10 has been replaced by alanine and cannot be phosphorylated, H3S10ph and H3K9me2 are lost whereas levels of Swi6 are decreased substantially (about three-fold).

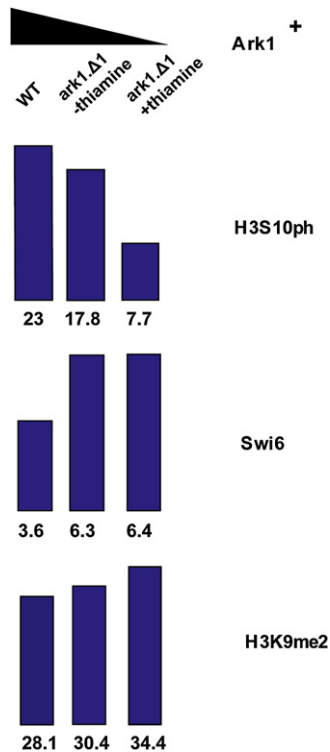

Figure S3. H3 Histone Modification in Serine-10 Kinase Mutants

*ark1.Δ1* cells are deficient for the H3S10 Aurora kinase Ark1 and undergo cell-cycle arrest but can be rescued in part by a *nmt1::ark1<sup>+</sup>* gene fusion on a complementing plasmid (*ark1.Δ1* - thiamine). When grown in thiamine (*ark1.Δ1* + thiamine), *nmt1::ark1<sup>+</sup>* is shut off, and the cells undergo cell-cycle arrest [S1]. In *ark1.Δ1* cells, H3K9me2 and Swi6 were increased, whereas H3S10ph decreased relative to strains with intact *ark1<sup>+</sup>* (WT).

Table S1. Strain list

| Strain Name | Genotype                                                                                                                                                    | Source                  |
|-------------|-------------------------------------------------------------------------------------------------------------------------------------------------------------|-------------------------|
| DG21        | <i>h<sup>-</sup>, otr1R(Sph1)::ura4, ura4-DS/E, ade6-216, his7-366, leu1-21</i>                                                                             | Li et al. [S2]          |
| DG124       | <i>h<sup>-</sup>, Δ-rdp1::kanMX6, otr1R(Sph1)::ura4, leu1-32, ade6-216, his7-366, uraDS/E</i>                                                               | Li et al. [S2]          |
| DG445       | <i>h<sup>+</sup>, Δ-rdp1::kanMX6, otr1R(Sph1)::ura4, leu1-32, ade6-216, his<sup>+</sup>, ura4-DS/E</i>                                                      | this study              |
| DG478       | <i>h<sup>+</sup>, Δ-ago1::kanMX6, otr1R(Sph1)::ura4, ade6<sup>-</sup>216, leu1-32, his<sup>-</sup></i>                                                      | this study              |
| ZB20        | <i>h<sup>-</sup>, Δ-ago1::kanMX6, otr1R(Sph1)::ura4, ura4<sup>-</sup> DS-E, ade6-216, leu1-32, his<sup>-</sup></i>                                          | Li et al. [S2]          |
| DG690       | <i>h<sup>-</sup>, Δ-dcr1::kanMX6, otr1R(Sph1)::ura4, ade6-210, leu1-32, his7-366</i>                                                                        | Li et al. [S2]          |
| DG691       | <i>h<sup>+</sup>, Δ-dcr1::kanMX6, otr1R(Sph1)::ura4, ade6-210, leu1-32</i>                                                                                  | this study              |
| DG704       | <i>h<sup>+</sup>, cdc25-22, leu1</i>                                                                                                                        | Hiraoka et al. [S3]     |
| DG705       | <i>h<sup>+</sup>, nda3-KM311, leu</i>                                                                                                                       | Hiraoka et al. [S3]     |
| DG706       | <i>h<sup>-</sup>, cdc10-129, leu1</i>                                                                                                                       | Hiraoka et al. [S3]     |
| FY6071      | <i>h?, h3.2-S10A, Δh3.1/h4.1::his3<sup>+</sup>, Δh3.3/h4.3::arg3<sup>+</sup>, leu1-32, ura4D18, his3D1, arg3D3, ade6-210, otr1R(Sph1)::ade6<sup>+</sup></i> | Mellone et al. [S4]     |
| IH2452      | <i>h<sup>+</sup>, ark1. Δ 1::LEU2, ura4D18, ade6<sup>-</sup>, +pRep82Ark1.PkC</i>                                                                           | Petersen and Hagan [S1] |
| AK01        | <i>cdc25-22, Δ-ago1::kanMX6</i>                                                                                                                             | this study              |
| AK02        | <i>cdc25-22, Δ-dcr1::kanMX6</i>                                                                                                                             | this study              |
| AK03        | <i>cdc25-22, Δ-rdp1::kanMX6</i>                                                                                                                             | this study              |
| AK04        | <i>nda3-KM311, Δ-ago1::kanMX6</i>                                                                                                                           | this study              |
| AK05        | <i>nda3-KM311, Δ-dcr1::kanMX6</i>                                                                                                                           | this study              |
| AK06        | <i>nda3-KM311, Δ-rdp1::kanMX6</i>                                                                                                                           | this study              |
| AK07        | <i>cdc10-129, Δ-ago1::kanMX6</i>                                                                                                                            | this study              |
| AK08        | <i>cdc10-129, Δ-rdp1::kanMX6</i>                                                                                                                            | this study              |
| AK09        | <i>cdc10-129, Δ-dcr1::kanMX6</i>                                                                                                                            | this study              |

Table S2. Oligonucleotide Sequences

| Primer Name              | Primer Sequence        |
|--------------------------|------------------------|
| p30F ( <i>dh</i> F)      | CCTGTTGATTCGGCACCTTTG  |
| p30R ( <i>dh</i> R)      | TGGAGAACGACTGTGAAGAGA  |
| p30F ( <i>dh</i> F) qPCR | CCATATCAATTTCCCATGTTCC |
| p30R ( <i>dh</i> R) qPCR | CATCAAGCGAGTCGAGATGA   |
| p33F ( <i>dg</i> F)      | TGCAAGTGGAAGTGGCTTCA   |
| p33R ( <i>dg</i> R)      | TCGACCACCCTGACTTGTTCTC |
| p33F ( <i>dg</i> F) qPCR | TATCCTGCGTCTCGGTATCC   |
| p33R ( <i>dg</i> R) qPCR | CTGTTGCGTGAATGCTGAGAAA |
| act1F                    | TACCCCATGAGCACGGTAT    |
| act1R                    | GGAGGAAGATTGAGCAGCAG   |
| act1F qPCR               | TGCACCTGCCTTTTATGTTG   |
| act1R qPCR               | TGGGAACAGTGTGGGTAACA   |
| ace2F                    | TCACAAATCCATACCGAGCA   |
| ace2R                    | GCGCACCGTTTATCTCATCT   |
| hhf2F                    | ATGTCTGGTCGTGAAAAGG    |
| hhf2R                    | ACCATAAATGGTACGGCCTTG  |
| psu1F                    | CGTGATGTGTCGGTTCGTTAC  |
| psu1R                    | AAGGGAATCAGTGCAATCG    |
| U6                       | ATGTGCGCAGTGCATCCTTG   |
